# Supplementary material for: LSD1 mediates metabolic reprogramming by glucocorticoids during myogenic differentiation
Source: PubMed Central journal article supplement — Nucleic Acids Res. 2018 Mar 29;46(11):5441–54. doi: 10.1093/nar/gky234 (PMC6009677; doi:10.1093/nar/gky234), 2018-03-29
Supplement: gky234_supplemental_files.pdf [file gky234_supplemental_files.pdf]

## **Supplementary Data**

### **Title:**

**LSD1 mediates metabolic reprogramming by glucocorticoids during myogenic differentiation**

### **Authors:**

Kotaro Anan<sup>1,2</sup>, Shinjiro Hino<sup>1\*</sup>, Noriaki Shimizu<sup>4</sup>, Akihisa Sakamoto<sup>1</sup>, Katsuya Nagaoka<sup>1</sup>, Ryuta Takase<sup>1</sup>, Kensaku Kohrogi<sup>1,2</sup>, Hirotaka Araki<sup>1</sup>, Yuko Hino<sup>1</sup>, Shingo Usuki<sup>3</sup>, Shinya Oki<sup>5</sup>, Hirotoshi Tanaka<sup>4</sup>, Kimitoshi Nakamura<sup>2</sup>, Fumio Endo<sup>2</sup>, and Mitsuyoshi Nakao<sup>1\*</sup>

### **Affiliations:**

<sup>1</sup>Department of Medical Cell Biology, Institute of Molecular Embryology and Genetics,

<sup>2</sup>Department of Pediatrics, Graduate School of Medical Sciences,

<sup>3</sup>Liaison Laboratory Research Promotion Center, Institute of Molecular Embryology and Genetics, Kumamoto University, Kumamoto 860-0811, Japan

<sup>4</sup>Division of Rheumatology, Center for Antibody and Vaccine Therapy, IMSUT Hospital, The Institute of Medical Science, The University of Tokyo, Tokyo 108-8639, Japan

<sup>5</sup>Department of Developmental Biology, Graduate school of Medical Sciences, Kyushu University, Fukuoka 812-8582, Japan

### **\*Corresponding Authors:**

Shinjiro Hino Ph.D. (s-hino@kumamoto-u.ac.jp)

Mitsuyoshi Nakao M.D., Ph.D. (mitnakao@kumamoto-u.ac.jp)

Department of Medical Cell Biology,

Institute of Molecular Embryology and Genetics, Kumamoto University

2-2-1 Honjo, Chuo-ku, Kumamoto 860-0811, Japan.

Phone: +81-96-373-6800; Fax: +81-96-373-6804

## SUPPLEMENTARY FIGURE LEGENDS

**Supplementary Figure S1.** LSD1 inhibition that does not interfere with myogenic differentiation. **(A)** Experimental procedures used: C2C12 mouse myoblasts were differentiated to myotubes in the absence or presence of LSD1 inhibition and then subjected to the indicated analyses. **(B)** Expression levels of differentiation marker genes in day 7-C2C12 cells treated with LSD1 inhibitors (n = 4). Quantitative RT-PCR data were normalized to values for the *36B4* gene, shown as fold differences against vehicle-treated controls. Concentrations of TC and S2101 were  $10^{-4}$  and  $10^{-5}$  M, respectively. **(C)** Myogenic differentiation of C2C12 cells under LSD1 inhibition. Cells were prepared as described for **(A)**. Myotube formation was analyzed by immunofluorescence imaging of myosin heavy chain (MHC). Scale bar, 100  $\mu$ m. **(D)** Quantitative analyses of myotube formation under S2101 treatment. The number of nuclei, ratio of MHC-expressing nuclei to total nuclei, and area and intensity of the MHC signal are shown for control and S2101-treated cells. Values are means  $\pm$  s.d. of 3 assay wells. For each well, 30 fields were counted.

**Supplementary Figure S2.** Effects of LSD1 inhibition on gene expression in differentiating myoblasts. **(A)** GSEA results for genes upregulated by LSD1 inhibition. Fourteen pathways were identified with statistically significant differences ( $p$ -value < 0.05 and FDR  $q$ -value < 0.25). Pathways related to lipid metabolism are highlighted in red. **(B)** Venn diagram of the genes with expression decreased by 1.5-fold or more by treatment with LSD1 inhibitors, TC or S2101 (left). Cells were collected at 48 h after myogenic induction. Controls were treated with vehicle. GSEA results for genes downregulated by LSD1 inhibition (right). Five pathways were identified with

statistically significant differences ( $p$ -value  $< 0.05$  and FDR  $q$ -value  $< 0.25$ ).

**Supplementary Figure S3.** Effects of LSD1 inhibition on metabolic properties of C2C12 cells. (A and B) Effects of LSD1 inhibition on the OXPHOS capacity of differentiated C2C12 cells. OCR/ECAR: the ratio of oxygen consumption rate (OCR, **Figure 1E**) to extracellular acidification rate (ECAR) (A) and ECAR (B) are shown ( $n = 10$ ). During real-time measurements, respiratory chain inhibitors were added to the medium at the indicated time points. Values are means  $\pm$  s.d. (C) Heatmap showing expression change of glycolysis related genes in LSD1-inhibited C2C12 cells. Expression data were extracted from microarray analyses described in **Figure 1A** and **S7**. Values are shown as fold differences against the average of each control.  $*p < 0.05$ ,  $**p < 0.01$ .

**Supplementary Figure S4.** LSD1 enrichment relative to histone modifications and RNA polymerase II peaks on day 2 (A) or 5 (B). Data are presented in the same manner as for **Figure 2C**.

**Supplementary Figure S5.** Distribution of LSD1-bound sites in differentiating (day 2) or differentiated (day 5) myoblasts. Enrichment of LSD1 at the oxidative *Atgl* (A) and *Pgcl $\alpha$*  (B) genes, the glycolytic *Gapdh* (C) gene and the slow fiber-associated *Tnncl* (D) gene loci. (E) No enrichment of LSD1 at the fast fiber-associated *Myh4* gene locus. ChIP-seq data were visualized using Strand NGS software (Strand Genomics). Histone modifications at the *Pgcl $\alpha$*  (B) and *Tnncl* (D) gene loci in control cells (described in **Figure 3C**) and publicly available ChIP-seq data for Rest, Max, Six4, MyoD and

myogenin are also shown (Data IDs are listed in **MATERIALS AND METHODS**).

**Supplementary Figure S6.** Scatter plots show the correlation between LSD1 enrichment and changes in H3K4 methylation by LSD1 inhibition. LSD1-enriched regions in C2C12 cells (day 2) are shown. The x-axis shows the enrichment levels of LSD1 in these regions and the y-axis shows changes in H3K4me1 (**A**), H3K4me2 (**B**) and H3K4me3 (**C**) enrichment levels induced by LSD1 inhibition. Enrichment values were normalized over input and are shown as log<sub>2</sub> ratio. The areas with more than 2.5 log values in the x-axis and with more than 0.5 or less than -0.5 log values in the y-axis are indicated by boxes. The region numbers included in each area are shown.

**Supplementary Figure S7.** Effects of LSD1 knockdown in C2C12 myoblasts. (**A**) LSD1 expression in shRNA-introduced cells. Protein was collected from C2C12 cells stably expressing shRNA at 48 h after myogenic induction. (**B**) Light microscope images of LSD1-KD C2C12 cells. sh*Lsd1*- or shControl-expressing C2C12 cells were analyzed at 7 d after myogenic induction. Scale bar, 500  $\mu$ m. (**C**) Venn diagram of the genes induced by 1.2-fold or more by LSD1-KD and LSD1-bound genes with expression upregulated by LSD1 inhibitors (**Figure 3B**). Microarray analysis was performed in sh*Lsd1*-expressing C2C12 cells at 48 h after myogenic induction. (**D**) Expression levels of oxidative metabolism and myogenesis genes in LSD1-KD cells at 48 h after myogenic induction (n = 3). Values are shown as fold differences against control shRNA-expressing samples. (**E** and **F**) H3K4me1 (**E**) and H3K4me2 (**F**) enrichment at LSD1-bound regions in LSD1-KD C2C12 cells. CHIP-qPCR analyses were performed in sh*Lsd1*-expressing C2C12 cells at 48 h after myogenic induction.

Values are means  $\pm$  s.d. \* $p$  < 0.05, \*\* $p$  < 0.01.

**Supplementary Figure S8.** Glucocorticoid treatment decreases the amount of LSD1 protein. **(A)** Procedures for sample preparation: C2C12 mouse myoblasts were differentiated to myotubes, then treated with hormones before being subjected to RNA and protein analyses. **(B)** Expression of LSD1 protein in C2C12 myotubes under various hormone treatments. Administered hormones were T: testosterone ( $10^{-8}$  M), E2: estradiol ( $10^{-8}$  M), Ins: insulin ( $10^{-7}$  M), EtOH: ethanol vehicle (0.1%), Dex: dexamethasone ( $10^{-6}$  M) and T3: triiodothyronine ( $10^{-8}$  M). Band densities were quantified by densitometry and normalized to those for histone H3. Values are shown as fold differences against those for the vehicle EtOH-treated control. **(C and D)** Expression of *LSD1* mRNA in C2C12 myotubes (C) and primary myoblasts (D) under Dex treatment (n = 3). qRT-PCR values are presented as fold differences, against those for vehicle treated controls. Values are means  $\pm$  s.d. NS: no significant difference.

**Supplementary Figure S9.** Glucocorticoid-induced *Jade2* expression results in LSD1 degradation. **(A)** Effect of proteasome inhibition on LSD1 protein under Dex treatment (n = 3). C2C12 cells were differentiated for 48 h and then treated with Dex ( $10^{-6}$  M) for 24 h. Cells were also treated with cycloheximide (CHX, 100  $\mu$ g/mL) and MG132 ( $10^{-5}$  M) for 6 h before harvest. **(B)** Glucocorticoid receptor (GR) occupancy the *Jade2* gene locus. ChIP analyses were performed using differentiating C2C12 cells treated with Dex for 48 h (n = 3). Numbers 1–6 indicate the sites used for qPCR experiments. Fold enrichment values were calculated relative to control IgG. **(C)** Nuclear accumulation of GR upon Dex treatment in Hepa1-6 cells. GR expression and accumulation into nuclei

was analyzed by immunofluorescence staining, using cells treated with EtOH (control) or Dex for 24 h. Scale bar, 10  $\mu\text{m}$ . **(D)** Effect of Jade2 knockdown on LSD1 protein under Dex treatment (n = 3). Hepa1-6 cells were transfected with si*Jade2*. At 24 h after transfection, cells were treated with Dex ( $10^{-6}$  M) for 48 h, together with CHX (100  $\mu\text{g}/\text{mL}$ ) for 6 h before harvesting samples. Target sequences of siRNA are shown in **MATERIALS AND METHODS**. **(E)** Expression of *LSD1* mRNA in gastrocnemius (Gas) and soleus (Sol) (n = 5). qRT-PCR values are presented as fold differences relative to those for Gas. **(F)** Expression of *Jade2* gene in fasted mice (n = 5). Microarray data from a public database (NCBI GSE46495) was used to calculate *Jade2* expression in mouse tissues after 24 h fasting. Values are fold differences against those for *ad libitum* fed mice, means  $\pm$  s.d. \* $p < 0.05$ , \*\* $p < 0.01$ . NS: no significant difference.

**Supplementary Figure S10.** Treatment with Dex activates slow myosin expression. **(A)** Expression levels of myosin genes in C2C12 myotubes treated with Dex and S2101 (n = 3). Values are fold differences against vehicle-treated controls. **(B)** Expression of slow-myosin heavy chain (slow-MHC) in Dex- and S2101-treated cells. C2C12 cells on myogenic day 5 were analyzed by immunofluorescence microscopy. Scale bar, 100  $\mu\text{m}$ . **(C)** Quantitative analyses of the images obtained in (B). The areas of slow-MHC signal, intensities of slow-MHC signal and the ratios of these parameters are shown. Values are means  $\pm$  s.d. of 3 assay wells. For each well, 30 fields were counted. Values are means  $\pm$  s.d. \* $p < 0.05$ , \*\* $p < 0.01$ , \*\*\* $p < 0.001$ .

**Supplementary Figure S11.** Schematic model of LSD1-mediated metabolic programming in differentiating myoblasts under the action of a glucocorticoid. Glucocorticoid via the glucocorticoid receptor (GR) induces expression of JADE-2, a ubiquitin E3 ligase for LSD1, resulting in de-repression of the target genes involved in oxidative metabolism.

**Supplementary Figure S12.** Uncropped western blot membranes presented in this study. Areas surrounded by black boxes are those shown in individual figures.

A

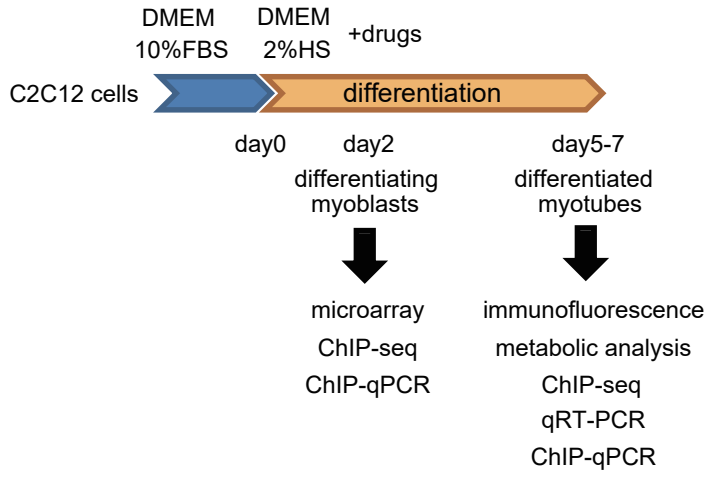

B

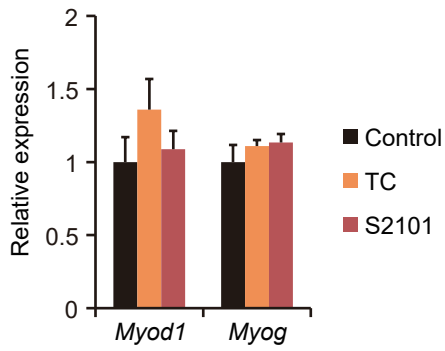

C

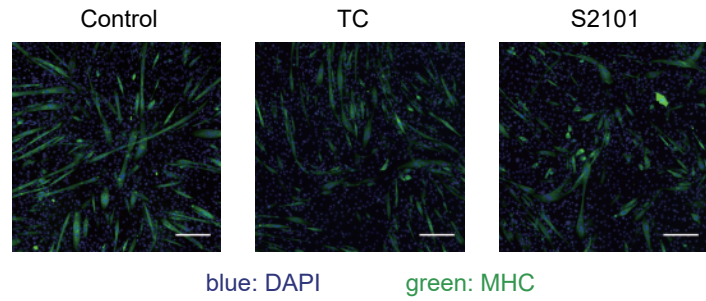

D

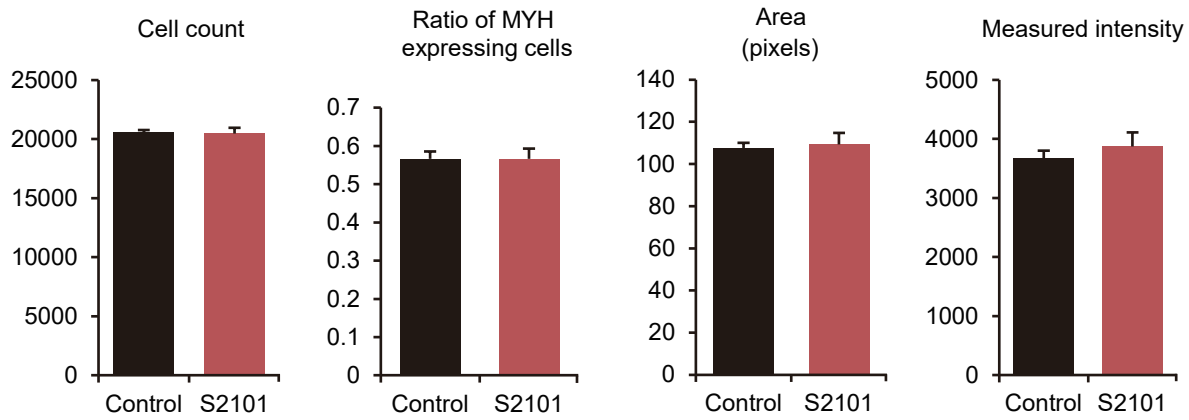



A

upregulated by LSD1 inhibition

| NAME                                                            | NOM p-value | FDR q-value |
|-----------------------------------------------------------------|-------------|-------------|
| KEGG_STEROID_BIOSYNTHESIS                                       | <0.001      | 0.007131594 |
| KEGG_LYSOSOME                                                   | <0.001      | 0.007186448 |
| KEGG_GLUTATHIONE_METABOLISM                                     | <0.001      | 0.008344005 |
| KEGG_SPHINGOLIPID_METABOLISM                                    | 0.002631579 | 0.01331426  |
| KEGG_DRUG_METABOLISM_CYTOCHROME_P450                            | 0.002604167 | 0.013592466 |
| KEGG_BIOSYNTHESIS_OF_UNSATURATED_FATTY_ACIDS                    | 0.014117647 | 0.1463684   |
| KEGG_METABOLISM_OF_XENOBIOTICS_BY_CYTOCHROME_P450               | 0.02676399  | 0.15217118  |
| KEGG_EPITHELIAL_CELL_SIGNALING_IN_HELICOBACTER_PYLORI_INFECTION | 0.005347594 | 0.15309496  |
| KEGG_FATTY_ACID_METABOLISM                                      | 0.011235955 | 0.1558389   |
| KEGG_INTESTINAL_IMMUNE_NETWORK_FOR_IGA_PRODUCTION               | 0.03141361  | 0.16073199  |
| KEGG_ABC_TRANSPORTERS                                           | 0.01038961  | 0.16581017  |
| KEGG_OXIDATIVE_PHOSPHORYLATION                                  | 0.003333333 | 0.178059    |
| KEGG_PROPYANOATE_METABOLISM                                     | 0.046035804 | 0.22476496  |
| KEGG_PEROXISOME                                                 | 0.026865672 | 0.2373898   |

B

decreased <1.5 fold      decreased <1.5 fold

by TC                      by S2101  
(512 genes)                (520 genes)

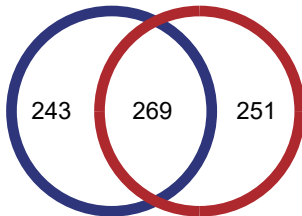

downregulated by LSD1 inhibition

| NAME                          | NOM p-value | FDR q-value |
|-------------------------------|-------------|-------------|
| KEGG_CELL_CYCLE               | <0.001      | 0.004345598 |
| KEGG_DNA_REPLICATION          | 0.001618123 | 0.021393025 |
| KEGG_MISMATCH_REPAIR          | 0.026086956 | 0.23018923  |
| KEGG_FOCAL_ADHESION           | 0.007032349 | 0.2200881   |
| KEGG_ECM_RECEPTOR_INTERACTION | 0.015360983 | 0.21840344  |

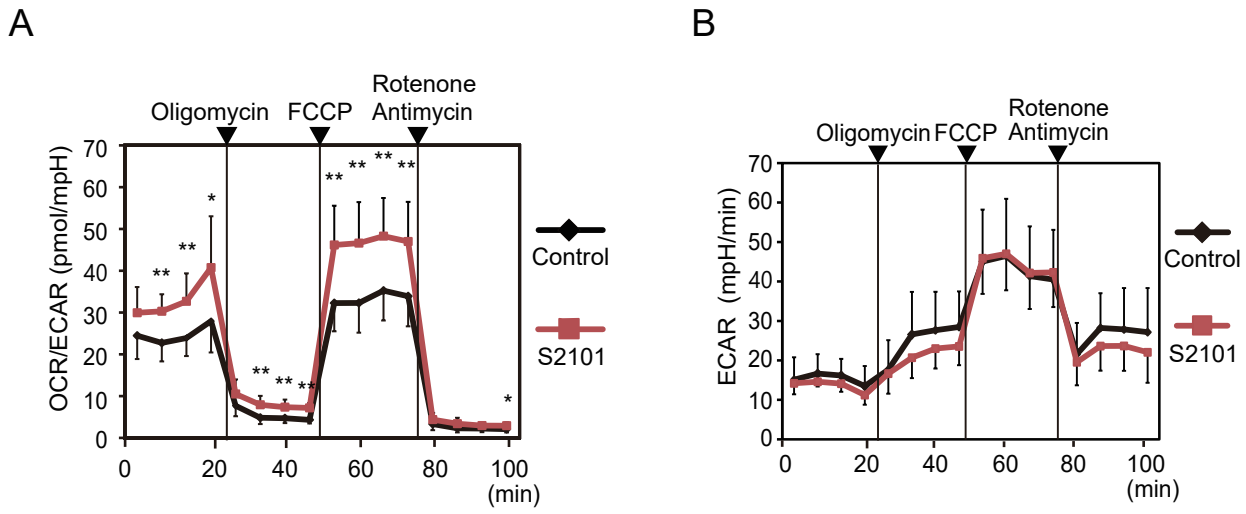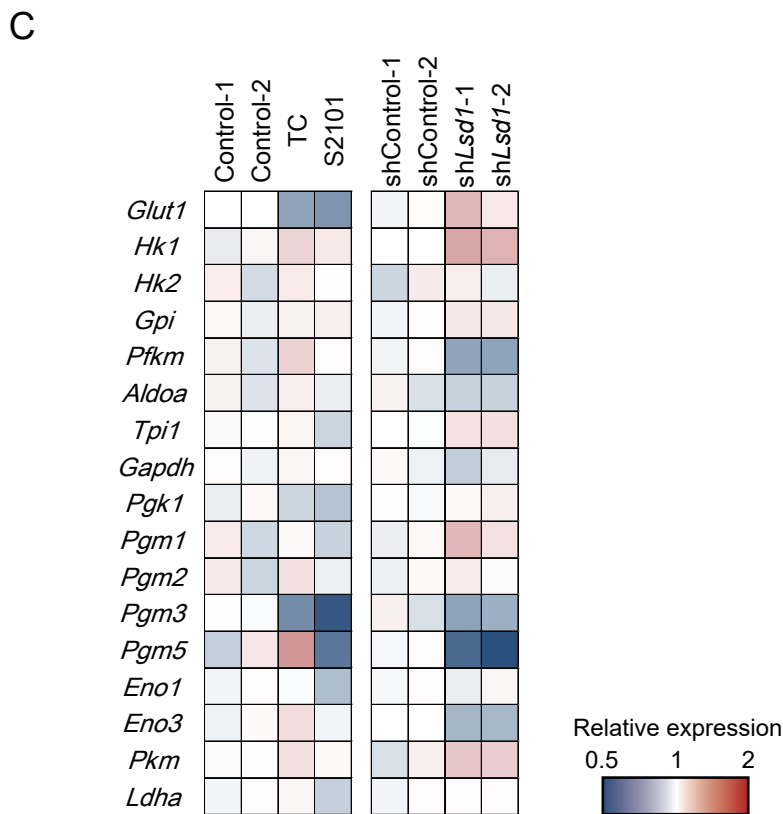



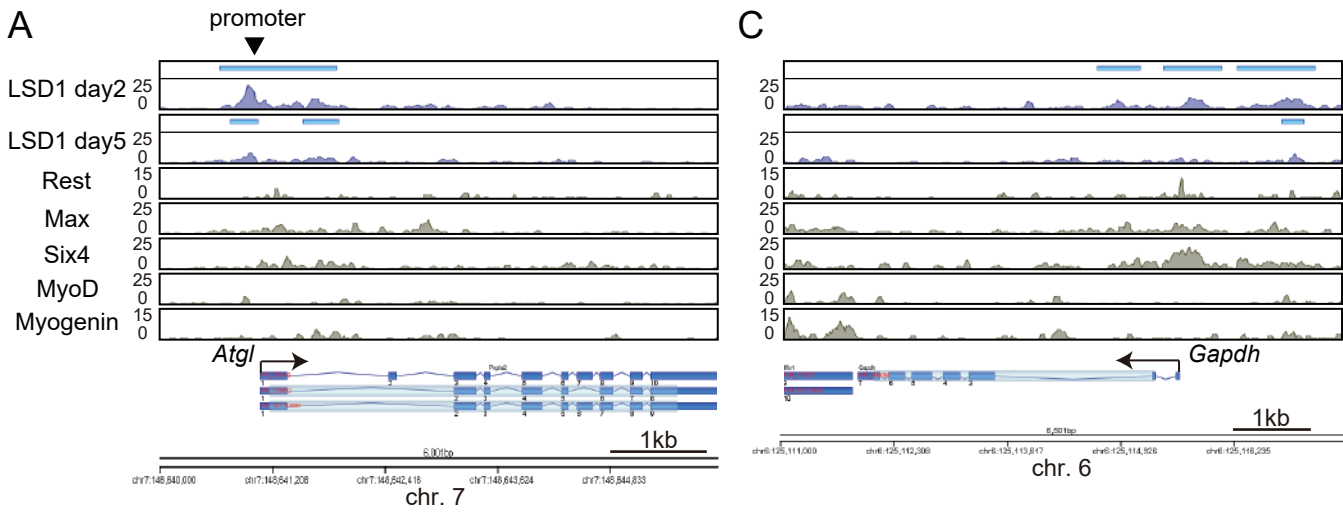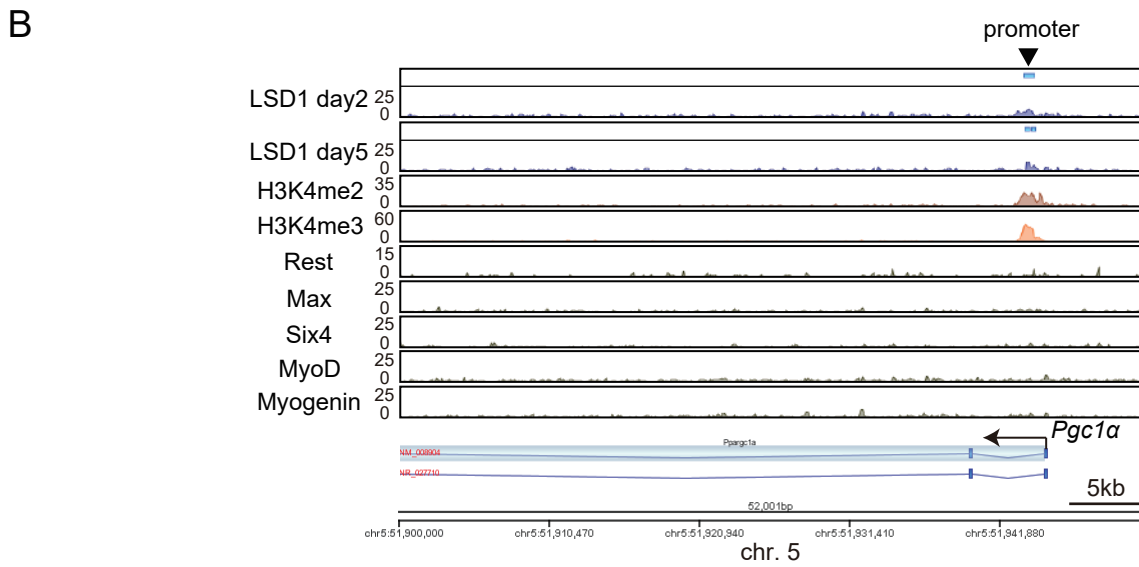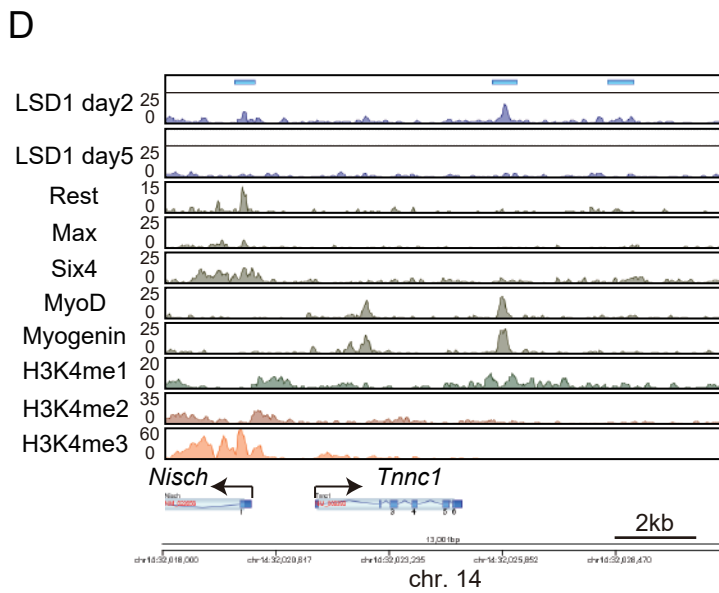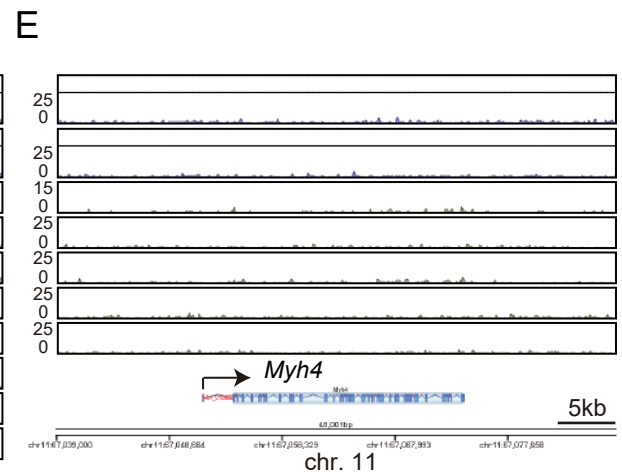

**A**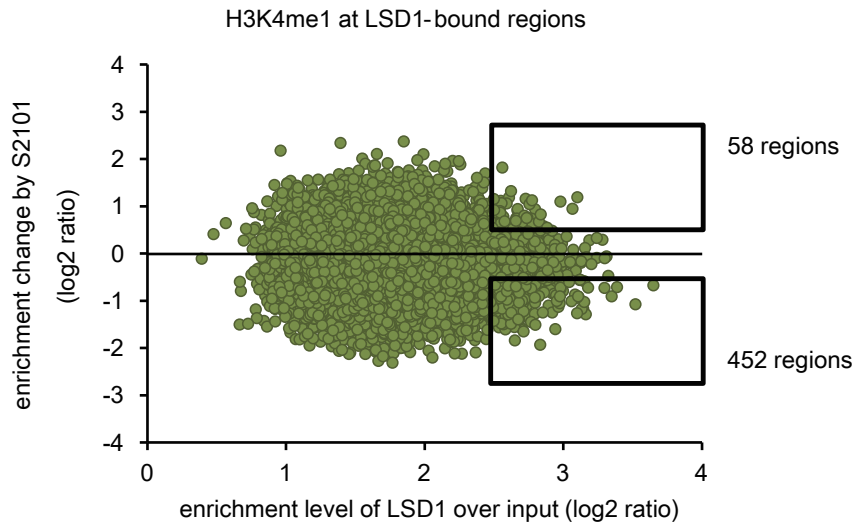**B**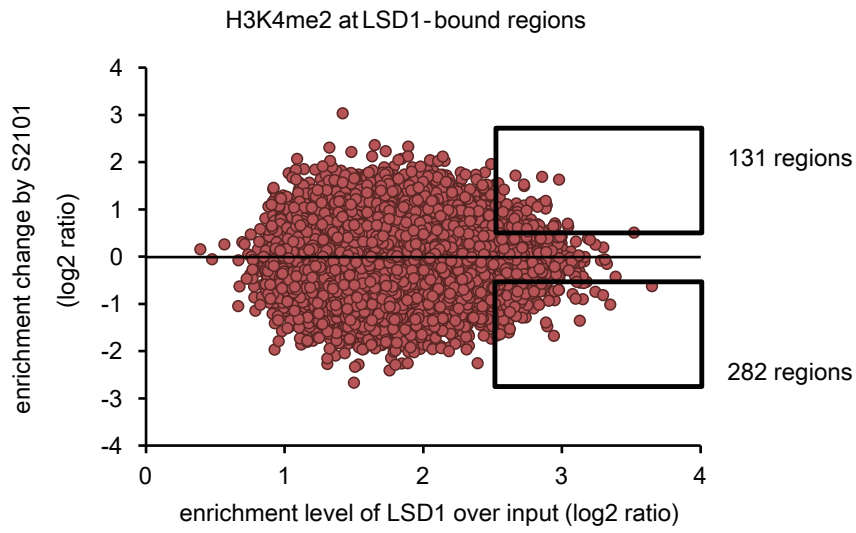**C**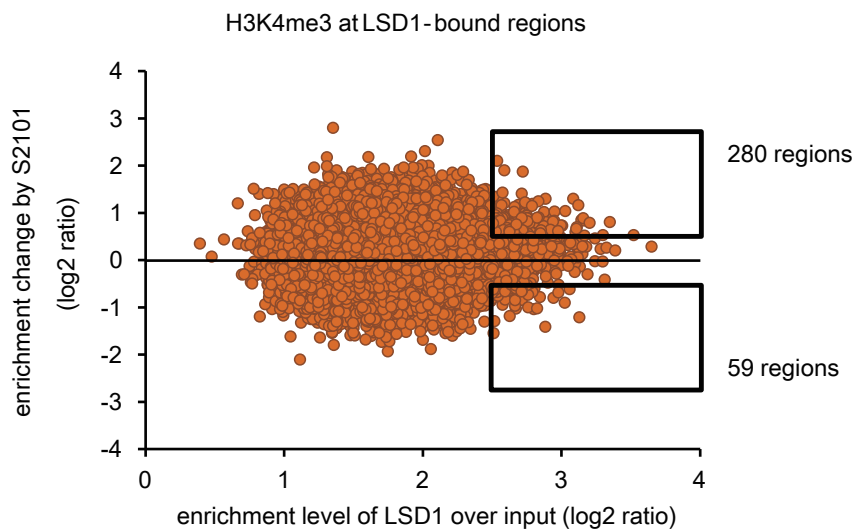

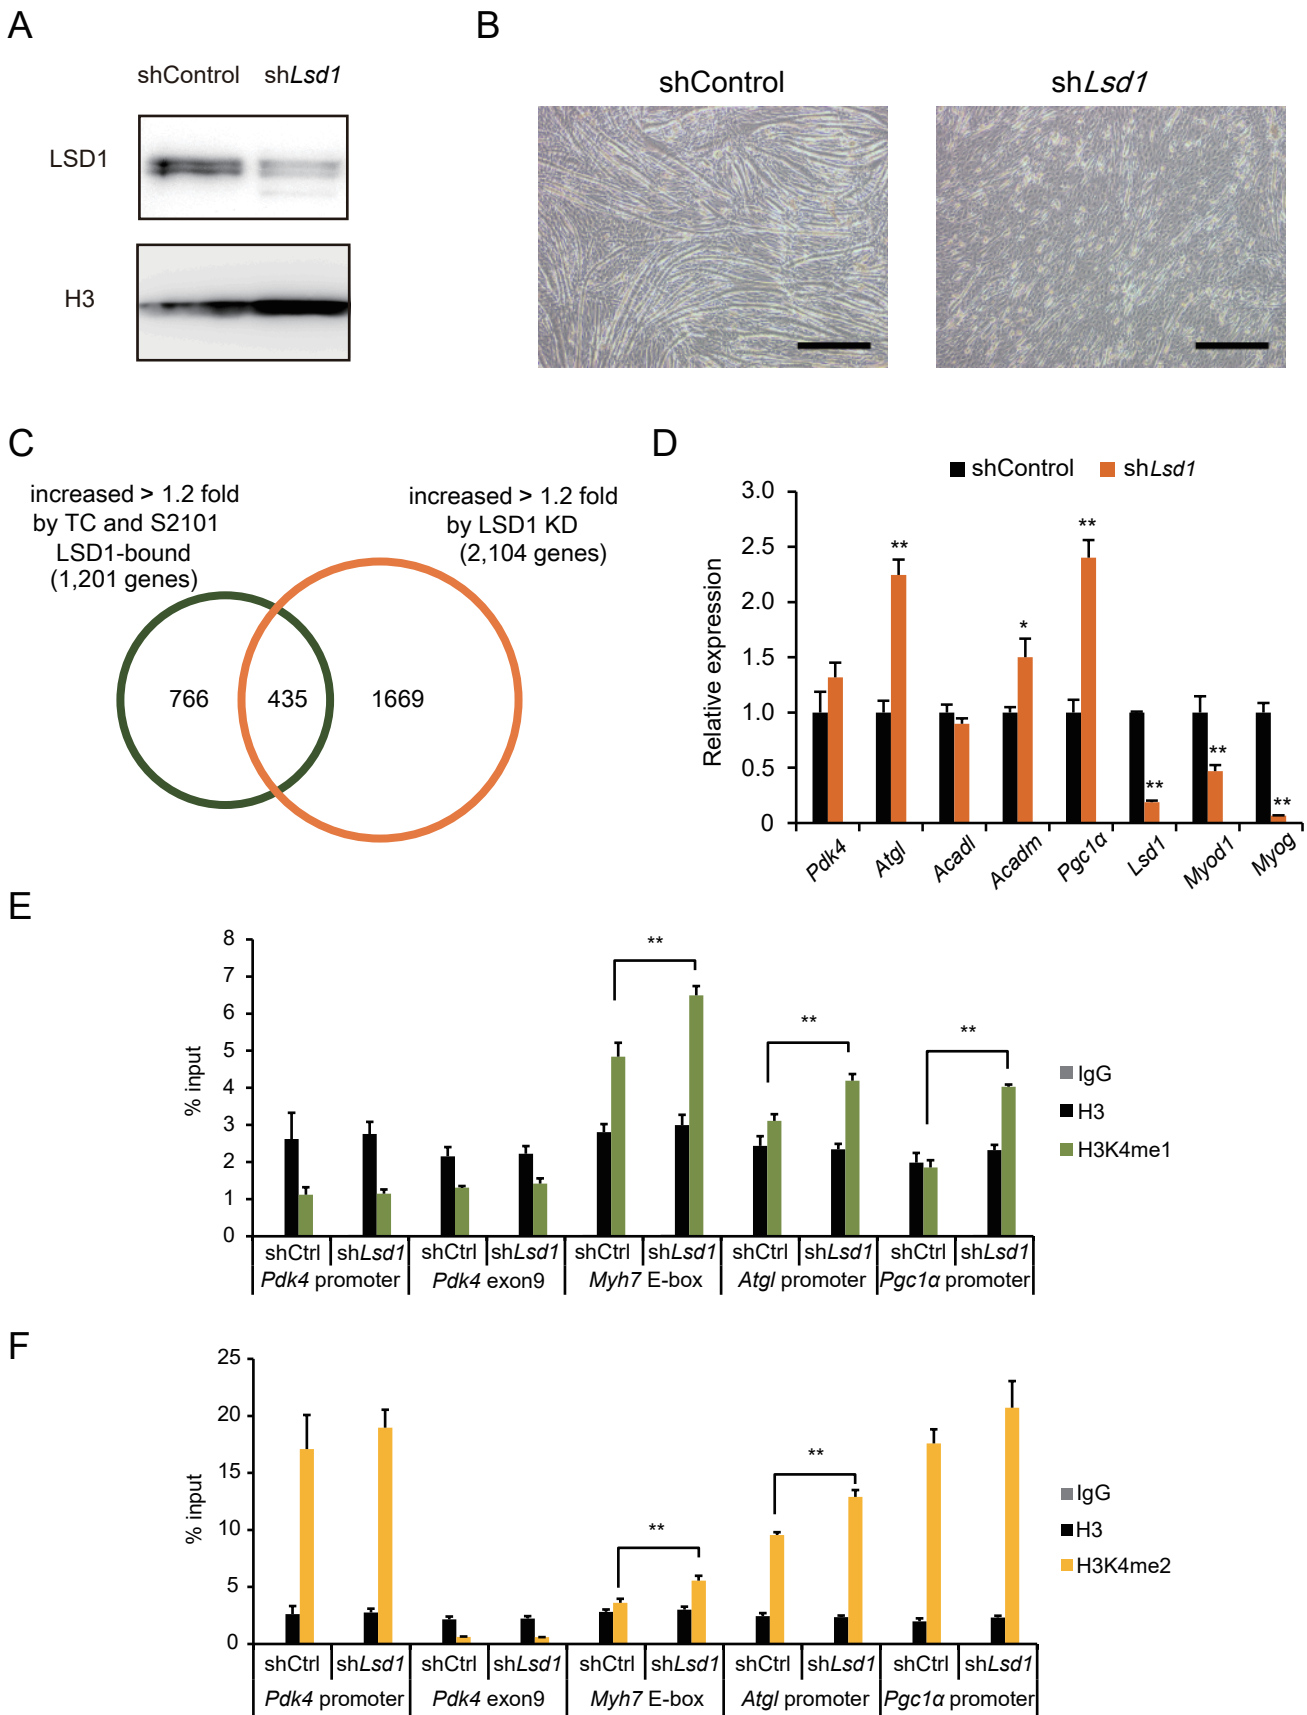

A

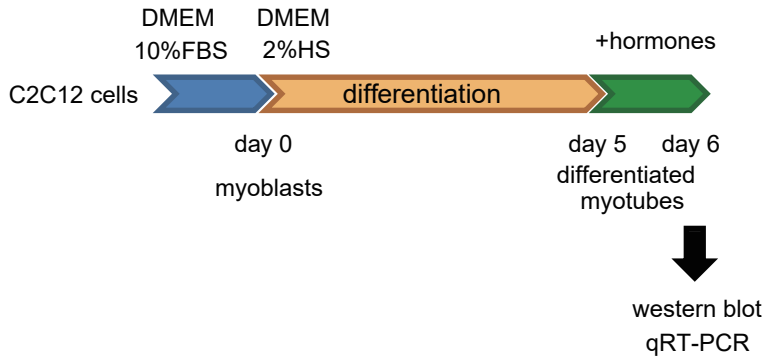

B

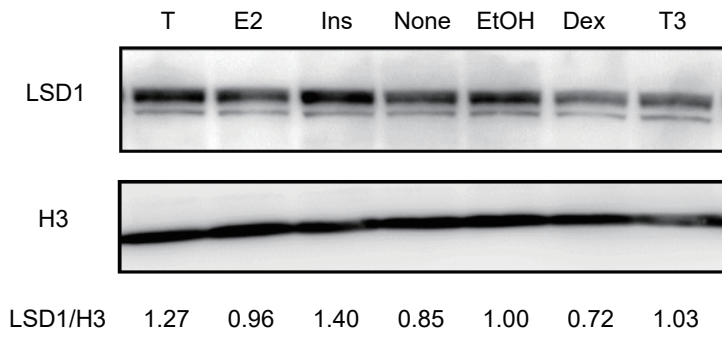

C

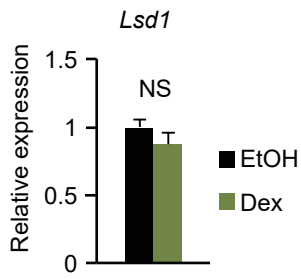

D

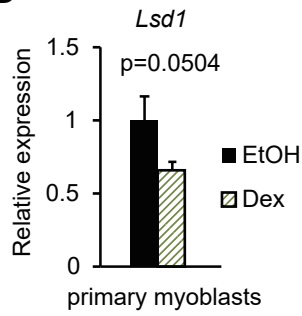

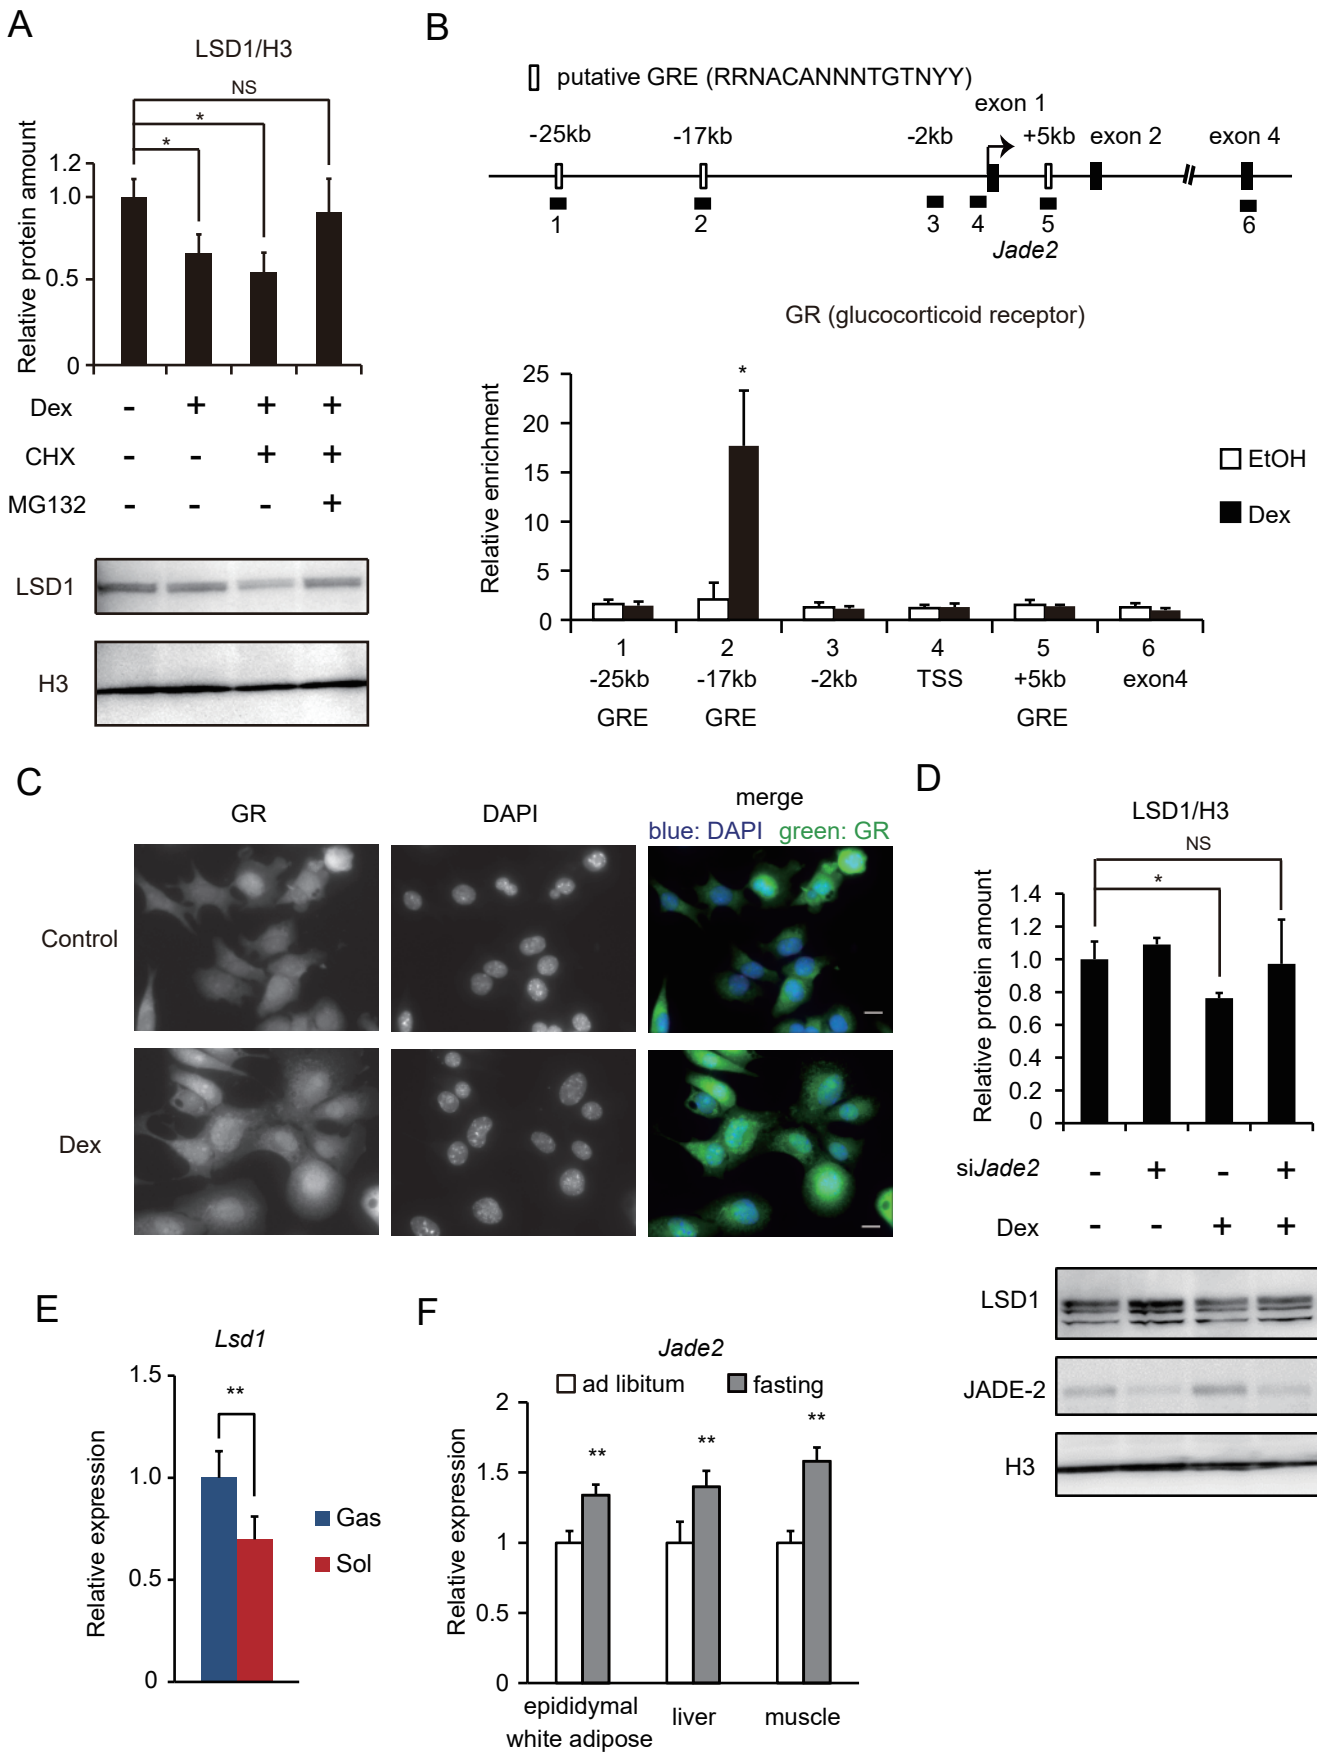



A

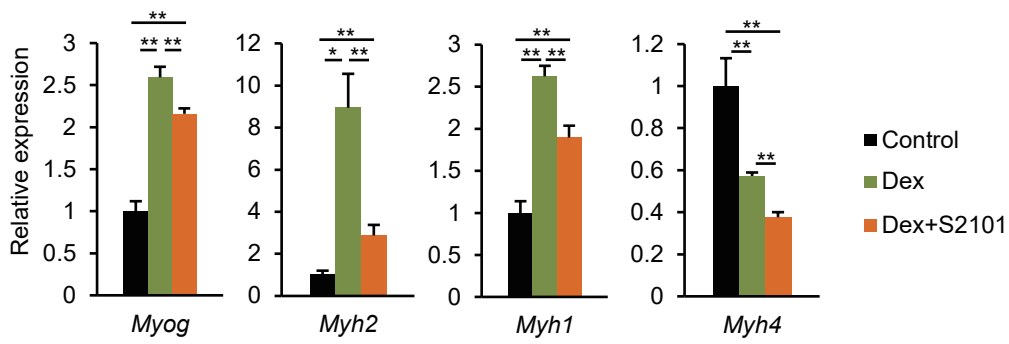

B

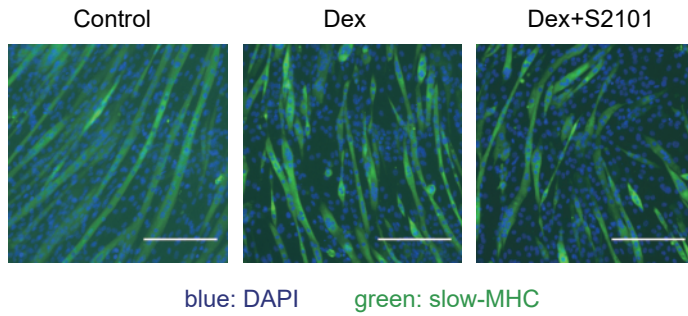

C

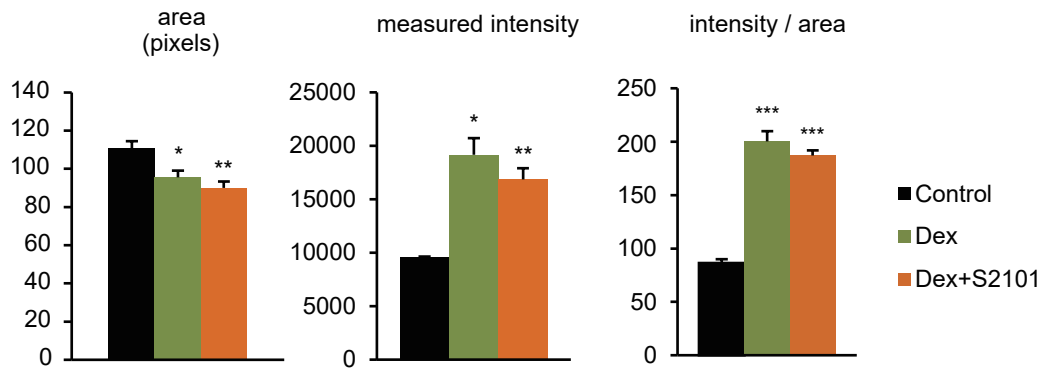

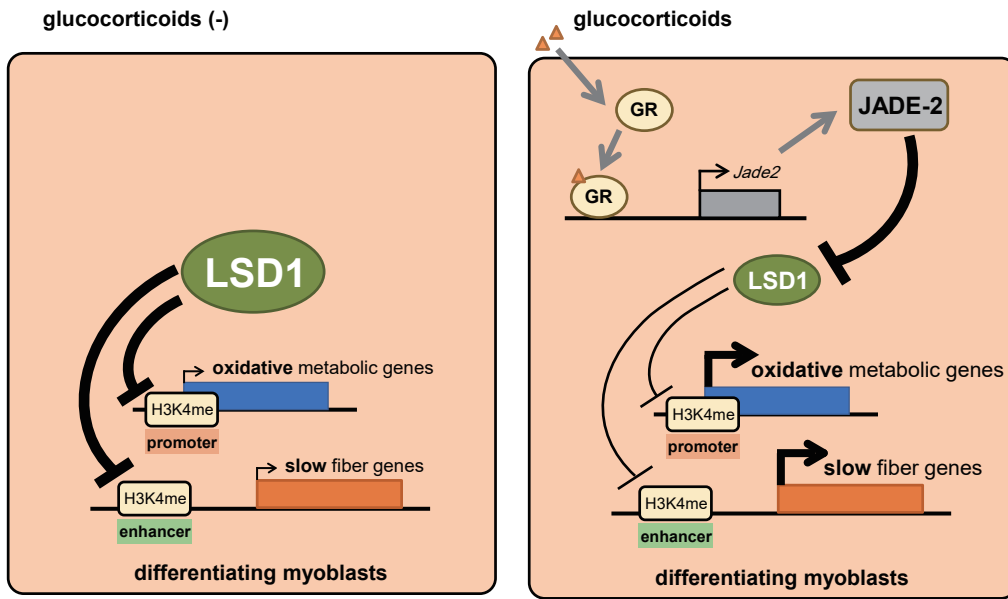

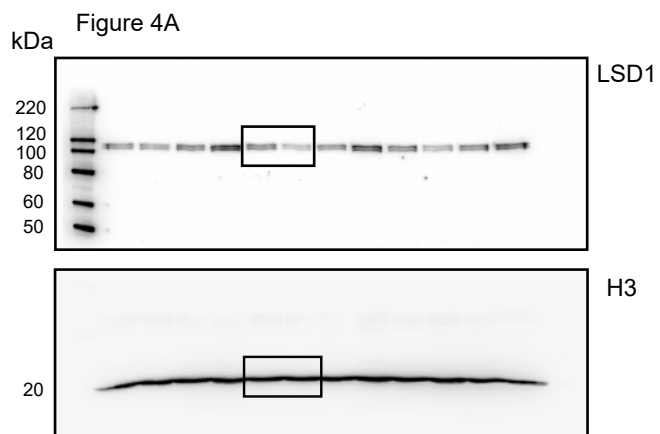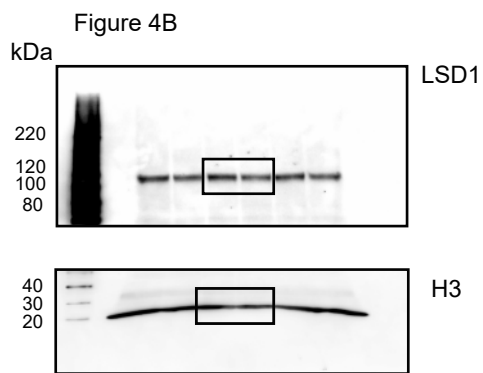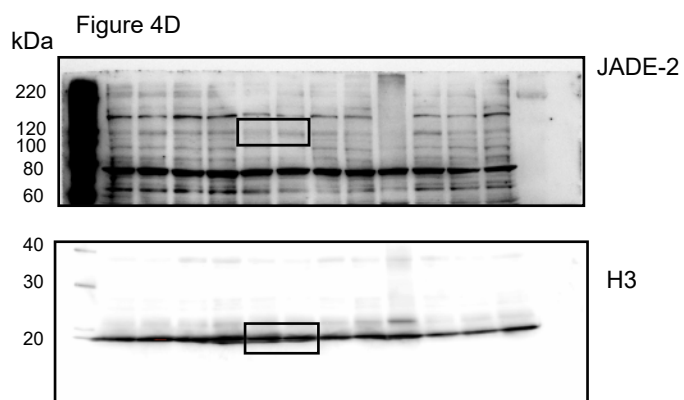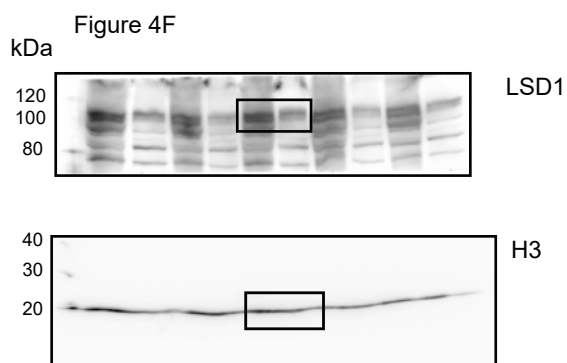

**Figure 4G**

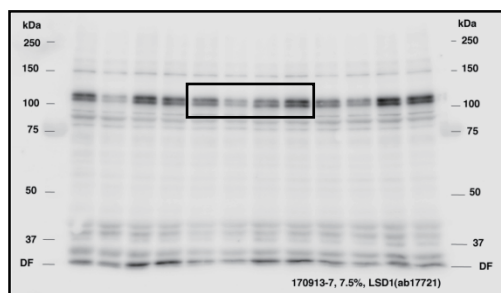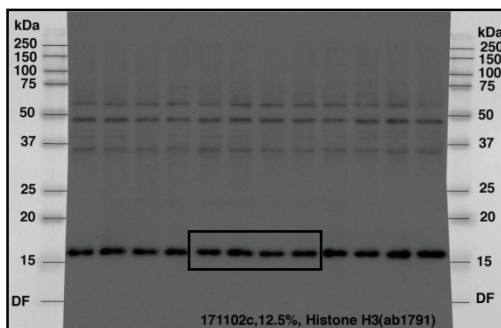

**Figure 4I**

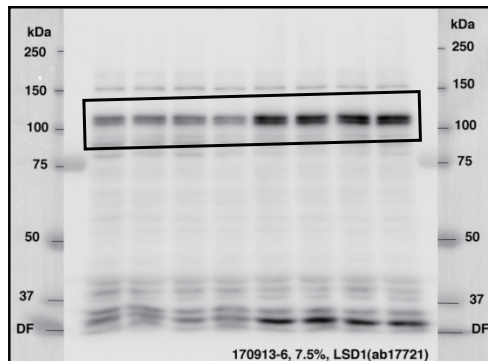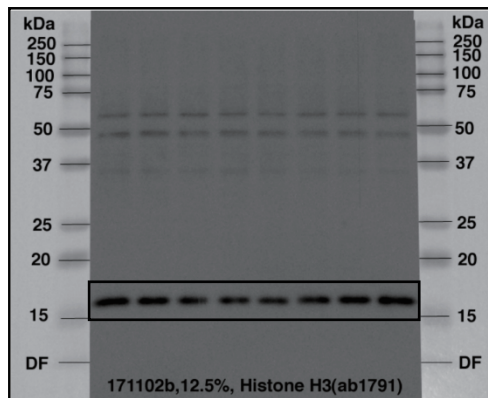

Figure S7A

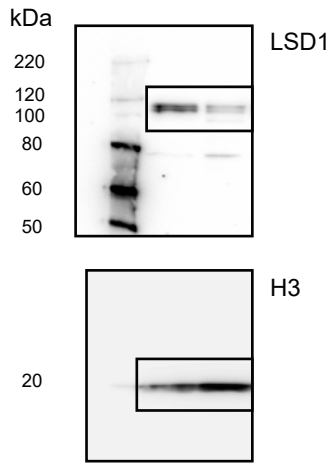

Figure S8B

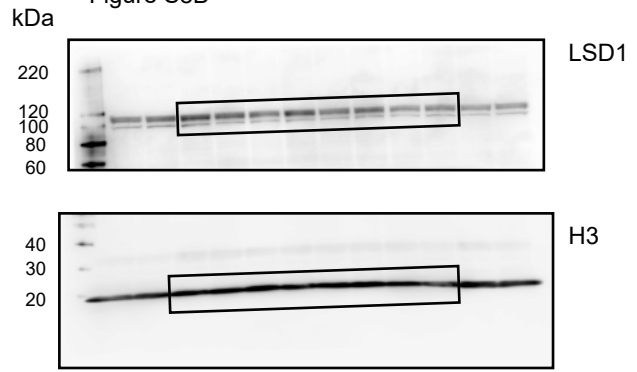

Figure S9A

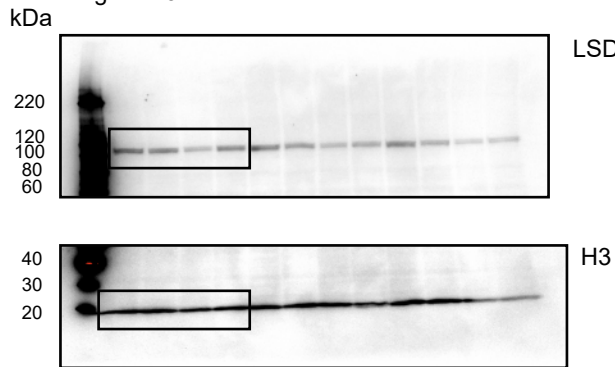

Figure S9D

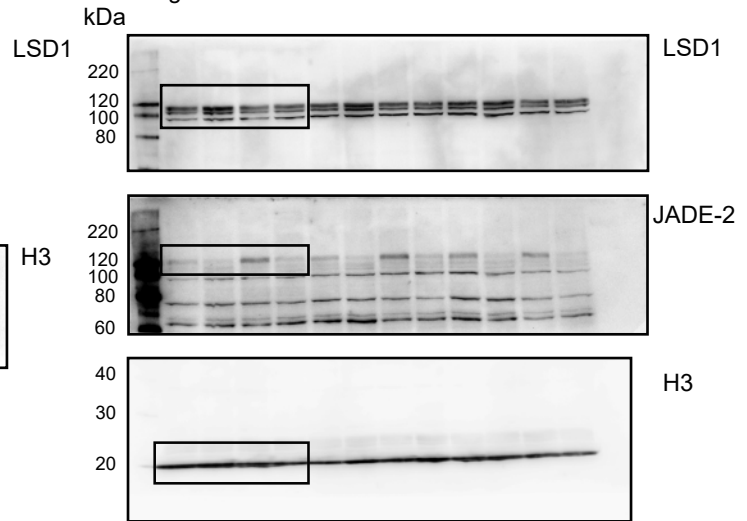

Table S1 - Primers used in this study

| Gene Symbol           | Gene Name                                                                       | Forward (5'-3')                                                                                                                              | Reverse (5'-3')                                                                                                                         |
|-----------------------|---------------------------------------------------------------------------------|----------------------------------------------------------------------------------------------------------------------------------------------|-----------------------------------------------------------------------------------------------------------------------------------------|
| Quantitative RT-PCR   |                                                                                 |                                                                                                                                              |                                                                                                                                         |
| <i>36B4</i>           | ribosomal protein, large, P0                                                    | GCGTCCTGGCATTGTCTGT                                                                                                                          | GCAAATGCAGATGGATCAGCC                                                                                                                   |
| <i>Lsd1</i>           | lysine (K)-specific demethylase 1A                                              | ATGGATGTCACACTTCTGGA                                                                                                                         | CAAGACCTGTTACAACCATG                                                                                                                    |
| <i>Pdk4</i>           | pyruvate dehydrogenase kinase, isoenzyme 4                                      | CAAGGAGATCTGAATCTCTA                                                                                                                         | GATAATGTTTGAAGGCTGAC                                                                                                                    |
| <i>Atgl</i>           | adipose triglyceride lipase<br>(patatin-like phospholipase domain containing 2) | GCCAACGCCACTCACATCTA                                                                                                                         | GCCTCCTTGGACACCTCAAT                                                                                                                    |
| <i>Acadl</i>          | acyl-Coenzyme A dehydrogenase, long-chain                                       | AGAACAGATCGAGAAGTTCA                                                                                                                         | GCGTTCGTTCTTACTCCTTG                                                                                                                    |
| <i>Acadm</i>          | acyl-Coenzyme A dehydrogenase, medium chain                                     | ATTTGGAAGCTGCTAGTGG                                                                                                                          | TGGTAACTGAGCCTAGCGAG                                                                                                                    |
| <i>Pgc1a</i>          | peroxisome proliferative activated receptor, gamma,<br>coactivator 1 alpha      | AAGTGTTGAACTCTCTGGAAGT                                                                                                                       | GGGTTATCTTGGTTGGCTTTATG                                                                                                                 |
| <i>Myh7</i>           | myosin, heavy polypeptide 7, cardiac muscle, beta                               | CTCAAGCTGCTCAGCAATCTATTT                                                                                                                     | GGAGCGCAAGTTTGTATAAAGT                                                                                                                  |
| <i>Myh2</i>           | myosin, heavy polypeptide 2, skeletal muscle, adult                             | GAGCAAAGATGCAGGGAAG                                                                                                                          | TAAGGGTTGACGGTGACACA                                                                                                                    |
| <i>Myh1</i>           | myosin, heavy polypeptide 1, skeletal muscle, adult                             | GCATCGAGTGGGAGTTCATT                                                                                                                         | TGAGCTTCAACCTTGCCTTT                                                                                                                    |
| <i>Myh4</i>           | myosin, heavy polypeptide 4, skeletal muscle                                    | ACATTATTGGCTGGCTGGAC                                                                                                                         | ACCCTTCTTCTTGGCACCTT                                                                                                                    |
| <i>Myl2</i>           | myosin, light polypeptide 2, regulatory, cardiac, slow                          | TGACCACACAAGCAGAGAGG                                                                                                                         | CCGTGGGTAAATGATGTGGA                                                                                                                    |
| <i>Myl1</i>           | myosin, light polypeptide 1                                                     | CCCAGCCAACCTAAGGAAG                                                                                                                          | TGCATTCACCTGTTCTGTCAA                                                                                                                   |
| <i>Mylpf</i>          | myosin light chain, phosphorylatable, fast skeletal<br>muscle                   | AGGGAGCTCCAACGTCTTCT                                                                                                                         | GCGTCGAGTTCCTCATTCTT                                                                                                                    |
| <i>Jade1</i>          | jade family PHD finger 1                                                        | CCCAGCAGCAGTGAGGATT                                                                                                                          | GATCAGGTCGGTCCATAACA                                                                                                                    |
| <i>Jade2</i>          | jade family PHD finger 2                                                        | CCATCAGCAGCGACAACCTCT                                                                                                                        | TGAGGGCTTCTTCTGTTCT                                                                                                                     |
| <i>Usp28</i>          | ubiquitin specific peptidase 28                                                 | GAGCTGCAGCAGGACGACT                                                                                                                          | ATCCTGGATGCCTGTGATTT                                                                                                                    |
| <i>Myod1</i>          | myogenic differentiation 1                                                      | TACAGTGGCGACTCAGATGC                                                                                                                         | GAGATGCGCTCCACTATGCT                                                                                                                    |
| <i>Myog</i>           | myogenin                                                                        | CAGTGAATGCAACTCCCACAGC                                                                                                                       | CACCCAGCCTGACAGACAATCTC                                                                                                                 |
| ChIP-quantitative PCR |                                                                                 |                                                                                                                                              |                                                                                                                                         |
| <i>Pdk4</i>           | promoter<br>exon 9                                                              | CTGGCTAGGAATGCGTGACA<br>GGTGTTCCTCTGAGGATTAC                                                                                                 | GATCCCAGGTCGCTAGGACT<br>GCATTCGGGAATTGTCCAT                                                                                             |
| <i>Atgl</i>           | promoter                                                                        | TGCCAAGCTGTGGGATTGA                                                                                                                          | AGCCATCTGAGAGACCTGGA                                                                                                                    |
| <i>Pgc1a</i>          | promoter<br>+100kb                                                              | GAGCAGCTCACTGCTTGTGT<br>CACAAACACCTGGCACTCAC                                                                                                 | CTCCAGAGATTACGGGAAA<br>CCACTTGCCTCATGCTGACA                                                                                             |
| <i>Myh7</i>           | E-box<br>promoter<br>exon 4<br>+10kb                                            | GGGTGCCTGGTGTATTGAGT<br>GGGGGAAATGCTTTTAGTGA<br>GCGGGAAGGCATATAGGTAA<br>CCACAATCCCACACCTCTCT                                                 | GCCAGGATTAGGGAGCTGA<br>CAGCTCCCACTCCTACCTGA<br>CATCGGGCACAAAACATC<br>ATGCCTGAGCCTGCGTATTT                                               |
| <i>Jade2</i>          | 1<br>2<br>3<br>4<br>5<br>6                                                      | CAAGCCATAGAGACACCCAAC<br>TGTGTCTGTGGCTGGATGA<br>TGGAGGGGAAAGGAAAATAA<br>CATCGCAGTTGGAGGCTATT<br>GGATGGGACAGCTCATTCT<br>TCCCAGATTCATACCAGCTCA | CAGTGGAGTGAAGGGAGAACA<br>CGGCTCTGTTTCCAGATT<br>TTTTTGAAGGCAGGTGGATG<br>CCTGCTGGGAAGATGGTC<br>AGGTTTTTCCTGCTCCACA<br>CACCCCTTTCTCCATTCTT |

Table S2 - Mapped read counts in ChIP-seq analysis

| Experiment # | Cells | Condition                                     | Antigen | Read counts |
|--------------|-------|-----------------------------------------------|---------|-------------|
| 1            | C2C12 | normally differentiated, on day 2             | input   | 16472156    |
| 1            | C2C12 | normally differentiated, on day 2             | LSD1    | 18031920    |
| 2            | C2C12 | normally differentiated, on day 5             | input   | 17298668    |
| 2            | C2C12 | normally differentiated, on day 5             | LSD1    | 15778509    |
| 3            | C2C12 | differentiated with control vehicle, on day 2 | input   | 15068639    |
| 3            | C2C12 | differentiated with control vehicle, on day 2 | H3K4me1 | 17664635    |
| 3            | C2C12 | differentiated with control vehicle, on day 2 | H3K4me2 | 13126558    |
| 3            | C2C12 | differentiated with S2101, on day 2           | input   | 13267750    |
| 3            | C2C12 | differentiated with S2101, on day 2           | H3K4me1 | 10139301    |
| 3            | C2C12 | differentiated with S2101, on day 2           | H3K4me2 | 12139283    |
| 4            | C2C12 | differentiated with control vehicle, on day 2 | input   | 14798951    |
| 4            | C2C12 | differentiated with control vehicle, on day 2 | H3      | 19367010    |
| 4            | C2C12 | differentiated with control vehicle, on day 2 | H3K4me3 | 13074866    |
| 4            | C2C12 | differentiated with S2101, on day 2           | input   | 17021862    |
| 4            | C2C12 | differentiated with S2101, on day 2           | H3      | 15851644    |
| 4            | C2C12 | differentiated with S2101, on day 2           | H3K4me3 | 14256097    |

Table S3 - 435 LSD1-bound genes upregulated by both inhibitors and LSD1 KD

| Gene Symbol   | Gene Title                                                    |
|---------------|---------------------------------------------------------------|
| 0610010O12Rik | RIKEN cDNA 0610010O12 gene                                    |
| 1200009I06Rik | RIKEN cDNA 1200009I06 gene                                    |
| 1700052N19Rik | RIKEN cDNA 1700052N19 gene                                    |
| 1700112E06Rik | RIKEN cDNA 1700112E06 gene                                    |
| 1810012P15Rik | RIKEN cDNA 1810012P15 gene                                    |
| 1810013D10Rik | RIKEN cDNA 1810013D10 gene                                    |
| 1810014F10Rik | RIKEN cDNA 1810014F10 gene                                    |
| 2310044G17Rik | RIKEN cDNA 2310044G17 gene                                    |
| 2410066E13Rik | RIKEN cDNA 2410066E13 gene                                    |
| 2410076I21Rik | RIKEN cDNA 2410076I21 gene                                    |
| A930001N09Rik | RIKEN cDNA A930001N09 gene                                    |
| AA467197      | expressed sequence AA467197                                   |
| Abca2         | ATP-binding cassette, sub-family A (ABC1), member 2           |
| Abca3         | ATP-binding cassette, sub-family A (ABC1), member 3           |
| Abcd2         | ATP-binding cassette, sub-family D (ALD), member 2            |
| Acer3         | alkaline ceramidase 3                                         |
| Acot11        | acyl-CoA thioesterase 11                                      |
| Acss2         | acyl-CoA synthetase short-chain family member 2               |
| Adamts1       | ADAMTS-like 1                                                 |
| Adamts4       | ADAMTS-like 4                                                 |
| Adamts5       | ADAMTS-like 5                                                 |
| Adh7          | alcohol dehydrogenase 7 (class IV), mu or sigma polypeptide   |
| Adi1          | acireductone dioxygenase 1                                    |
| Adora2b       | adenosine A2b receptor                                        |
| Afap1l2       | actin filament associated protein 1-like 2                    |
| Aig1          | androgen-induced 1                                            |
| Aldh1l1       | aldehyde dehydrogenase 1 family, member L1                    |
| Aldh2         | aldehyde dehydrogenase 2, mitochondrial                       |
| Aldh3a1       | aldehyde dehydrogenase family 3, subfamily A1                 |
| Aldoc         | aldolase C, fructose-bisphosphate                             |
| Ampd3         | adenosine monophosphate deaminase 3                           |
| Aox1          | aldehyde oxidase 1                                            |
| Ap1g2         | adaptor protein complex AP-1, gamma 2 subunit                 |
| Apobec1       | apolipoprotein B mRNA editing enzyme, catalytic polypeptide 1 |
| Apol7a        | apolipoprotein L 7a                                           |
| Aqp1          | aquaporin 1                                                   |
| Aqp5          | aquaporin 5                                                   |
| Ar            | androgen receptor                                             |
| Areg          | amphiregulin                                                  |
| Arhgap18      | Rho GTPase activating protein 18                              |
| Arhgef3       | Rho guanine nucleotide exchange factor (GEF) 3                |
| Armc10        | armadillo repeat containing 10                                |
| Arrb2         | arrestin, beta 2                                              |
| Artn          | artemin                                                       |
| Arvcf         | armadillo repeat gene deleted in velo-cardio-facial syndrome  |
| As3mt         | arsenic (+3 oxidation state) methyltransferase                |
| Asl           | argininosuccinate lyase                                       |
| Atat1         | alpha tubulin acetyltransferase 1                             |
| Atl1          | atlastin GTPase 1                                             |
| Atl3          | atlastin GTPase 3                                             |
| Atp6v0e2      | ATPase, H <sup>+</sup> transporting, lysosomal V0 subunit E2  |
| AU018091      | expressed sequence AU018091                                   |
| Axl           | AXL receptor tyrosine kinase                                  |
| BC046404      | cDNA sequence BC046404                                        |
| BC052040      | cDNA sequence BC052040                                        |
| Bdh2          | 3-hydroxybutyrate dehydrogenase, type 2                       |
| Bdkrb2        | bradykinin receptor, beta 2                                   |
| Best1         | bestrophin 1                                                  |
| Bicd1         | bicaudal D homolog 1 (Drosophila)                             |

|               |                                                                                     |
|---------------|-------------------------------------------------------------------------------------|
| Bid           | BH3 interacting domain death agonist                                                |
| Bik           | BCL2-interacting killer                                                             |
| Blnk          | B cell linker                                                                       |
| Bst2          | bone marrow stromal cell antigen 2                                                  |
| Btbd11        | BTB (POZ) domain containing 11                                                      |
| C1galt1       | core 1 synthase, glycoprotein-N-acetylgalactosamine 3-beta-galactosyltransferase, 1 |
| C1s           | complement component 1, s subcomponent                                              |
| C630004H02Rik | RIKEN cDNA C630004H02 gene                                                          |
| Cacfd1        | calcium channel flower domain containing 1                                          |
| Cacnb2        | calcium channel, voltage-dependent, beta 2 subunit                                  |
| Cadm4         | cell adhesion molecule 4                                                            |
| Calcr1        | calcitonin receptor-like                                                            |
| Capn5         | calpain 5                                                                           |
| Car13         | carbonic anhydrase 13                                                               |
| Car2          | carbonic anhydrase 2                                                                |
| Car3          | carbonic anhydrase 3                                                                |
| Car7          | carbonic anhydrase 7                                                                |
| Car8          | carbonic anhydrase 8                                                                |
| Card10        | caspase recruitment domain family, member 10                                        |
| Cbr2          | carbonyl reductase 2                                                                |
| Cck           | cholecystokinin                                                                     |
| Cd24a         | CD24a antigen                                                                       |
| Cd55          | CD55 antigen                                                                        |
| Cda           | cytidine deaminase                                                                  |
| Cdc42bpg      | CDC42 binding protein kinase gamma (DMPK-like)                                      |
| Cdh1          | cadherin 1                                                                          |
| Cdk2ap2       | CDK2-associated protein 2                                                           |
| Cebpb         | CCAAT/enhancer binding protein (C/EBP), beta                                        |
| Celf5         | CUGBP, Elav-like family member 5                                                    |
| Cerk          | ceramide kinase                                                                     |
| Cgnl1         | cingulin-like 1                                                                     |
| Ch25h         | cholesterol 25-hydroxylase                                                          |
| Chchd10       | coiled-coil-helix-coiled-coil-helix domain containing 10                            |
| Chd7          | chromodomain helicase DNA binding protein 7                                         |
| Chd8          | chromodomain helicase DNA binding protein 8                                         |
| Chek1         | checkpoint kinase 1                                                                 |
| Chmp4c        | charged multivesicular body protein 4C                                              |
| Chn2          | chimerin (chimaerin) 2                                                              |
| Cklf          | chemokine-like factor                                                               |
| Clca5         | chloride channel calcium activated 5                                                |
| Clcn3         | chloride channel 3                                                                  |
| Cldn7         | claudin 7                                                                           |
| Cldn9         | claudin 9                                                                           |
| Clic5         | chloride intracellular channel 5                                                    |
| Clip4         | CAP-GLY domain containing linker protein family, member 4                           |
| Clmn          | calmin                                                                              |
| Clu           | clusterin                                                                           |
| Cmb1          | carboxymethylenebutenolidase-like (Pseudomonas)                                     |
| Cobl          | cordon-bleu                                                                         |
| Cobl1         | Cobl-like 1                                                                         |
| Coro1a        | coronin, actin binding protein 1A                                                   |
| Cox7a1        | cytochrome c oxidase, subunit VIIa 1                                                |
| Cpd           | carboxypeptidase D                                                                  |
| Creb5         | cAMP responsive element binding protein 5                                           |
| Creld1        | cysteine-rich with EGF-like domains 1                                               |
| Crem          | cAMP responsive element modulator                                                   |
| Csf2rb        | colony stimulating factor 2 receptor, beta, low-affinity (granulocyte-macrophage)   |
| Cst6          | cystatin E/M                                                                        |
| Ctnnal1       | catenin (cadherin associated protein), alpha-like 1                                 |
| Ctsb          | cathepsin B                                                                         |
| Cxcr4         | chemokine (C-X-C motif) receptor 4                                                  |



|               |                                                                                     |
|---------------|-------------------------------------------------------------------------------------|
| Cyfp2         | cytoplasmic FMR1 interacting protein 2                                              |
| Cyp26a1       | cytochrome P450, family 26, subfamily a, polypeptide 1                              |
| Dab2          | disabled 2, mitogen-responsive phosphoprotein                                       |
| Dact2         | dapper homolog 2, antagonist of beta-catenin (xenopus)                              |
| Dbi           | diazepam binding inhibitor                                                          |
| Ddah1         | dimethylarginine dimethylaminohydrolase 1                                           |
| Dennd3        | DENN/MADD domain containing 3                                                       |
| Dmxl2         | Dmx-like 2                                                                          |
| Dntt          | Deoxynucleotidyltransferase, terminal                                               |
| Dock11        | dedicator of cytokinesis 11                                                         |
| Dock5         | dedicator of cytokinesis 5                                                          |
| Dock8         | dedicator of cytokinesis 8                                                          |
| Dock9         | dedicator of cytokinesis 9                                                          |
| Dok7          | docking protein 7                                                                   |
| Dopey2        | dopey family member 2                                                               |
| Dpp7          | dipeptidylpeptidase 7                                                               |
| Dpy19l3       | dpy-19-like 3 (C. elegans)                                                          |
| Dtd1          | D-tyrosyl-tRNA deacylase 1 homolog (S. cerevisiae)                                  |
| Dtna          | dystrobrevin alpha                                                                  |
| Dtwd2         | DTW domain containing 2                                                             |
| E130308A19Rik | RIKEN cDNA E130308A19 gene                                                          |
| Elovl6        | ELOVL family member 6, elongation of long chain fatty acids (yeast)                 |
| Elovl7        | ELOVL family member 7, elongation of long chain fatty acids (yeast)                 |
| Eml2          | echinoderm microtubule associated protein like 2                                    |
| Eml5          | echinoderm microtubule associated protein like 5                                    |
| Enpp4         | ectonucleotide pyrophosphatase/phosphodiesterase 4                                  |
| Epb4.115      | erythrocyte protein band 4.1-like 5                                                 |
| Epb4.9        | erythrocyte protein band 4.9                                                        |
| Ephx4         | epoxide hydrolase 4                                                                 |
| Epn2          | epsin 2                                                                             |
| Eps8          | epidermal growth factor receptor pathway substrate 8                                |
| Ermp1         | endoplasmic reticulum metalloproteinase 1                                           |
| Etfdh         | electron transferring flavoprotein, dehydrogenase                                   |
| Ethe1         | ethylmalonic encephalopathy 1                                                       |
| Etl4          | enhancer trap locus 4                                                               |
| Exd1          | exonuclease 3'-5' domain containing 1                                               |
| Exoc6         | exocyst complex component 6                                                         |
| Eya1          | eyes absent 1 homolog (Drosophila)                                                  |
| Ezr           | ezrin                                                                               |
| F11r          | F11 receptor                                                                        |
| Fads2         | fatty acid desaturase 2                                                             |
| Fam107a       | family with sequence similarity 107, member A                                       |
| Fam55c        | family with sequence similarity 55, member C                                        |
| Fam84b        | family with sequence similarity 84, member B                                        |
| Fdft1         | farnesyl diphosphate farnesyl transferase 1                                         |
| Fetub         | fetuin beta                                                                         |
| Fez1          | fasciculation and elongation protein zeta 1 (zygin I)                               |
| Fgd2          | FYVE, RhoGEF and PH domain containing 2                                             |
| Fgl2          | fibrinogen-like protein 2                                                           |
| Foxc2         | forkhead box C2                                                                     |
| Foxred2       | FAD-dependent oxidoreductase domain containing 2                                    |
| Galm          | galactose mutarotase                                                                |
| Galnt6        | UDP-N-acetyl-alpha-D-galactosamine:polypeptide N-acetylgalactosaminyltransferase 6  |
| Galnt7        | UDP-N-acetyl-alpha-D-galactosamine: polypeptide N-acetylgalactosaminyltransferase 7 |
| Gbe1          | glucan (1,4-alpha-), branching enzyme 1                                             |
| Gch1          | GTP cyclohydrolase 1                                                                |
| Gcnt2         | glucosaminyl (N-acetyl) transferase 2, I-branching enzyme                           |
| Gdpd1         | glycerophosphodiester phosphodiesterase domain containing 1                         |
| Gdpd5         | glycerophosphodiester phosphodiesterase domain containing 5                         |
| Gfra2         | glial cell line derived neurotrophic factor family receptor alpha 2                 |
| Gja3          | gap junction protein, alpha 3                                                       |

|          |                                                                                               |
|----------|-----------------------------------------------------------------------------------------------|
| Gm2a     | GM2 ganglioside activator protein                                                             |
| Gna14    | guanine nucleotide binding protein, alpha 14                                                  |
| Gpm6b    | glycoprotein m6b                                                                              |
| Gpnmb    | glycoprotein (transmembrane) nmb                                                              |
| Gpr133   | G protein-coupled receptor 133                                                                |
| Gpr173   | G-protein coupled receptor 173                                                                |
| Gramd1b  | GRAM domain containing 1B                                                                     |
| Grasp    | GRP1 (general receptor for phosphoinositides 1)-associated scaffold protein                   |
| Grina    | glutamate receptor, ionotropic, N-methyl D-aspartate-associated protein 1 (glutamate binding) |
| Grn      | granulin                                                                                      |
| Gspt2    | G1 to S phase transition 2                                                                    |
| Gsta4    | glutathione S-transferase, alpha 4                                                            |
| Gstm1    | glutathione S-transferase, mu 1                                                               |
| Havcr2   | hepatitis A virus cellular receptor 2                                                         |
| Hdc      | histidine decarboxylase                                                                       |
| Heg1     | HEG homolog 1 (zebrafish)                                                                     |
| Hltf     | helicase-like transcription factor                                                            |
| Hnmt     | histamine N-methyltransferase                                                                 |
| Hoxa3    | homeobox A3                                                                                   |
| Hsd3b7   | hydroxy-delta-5-steroid dehydrogenase, 3 beta- and steroid delta-isomerase 7                  |
| Hspa4l   | heat shock protein 4 like                                                                     |
| Htr1b    | 5-hydroxytryptamine (serotonin) receptor 1B                                                   |
| Id2      | inhibitor of DNA binding 2                                                                    |
| Ier3     | immediate early response 3                                                                    |
| Ifitm1   | interferon induced transmembrane protein 1                                                    |
| Ifitm3   | interferon induced transmembrane protein 3                                                    |
| Igfbp5   | insulin-like growth factor binding protein 5                                                  |
| Il33     | interleukin 33                                                                                |
| Il6ra    | interleukin 6 receptor, alpha                                                                 |
| Insig1   | insulin induced gene 1                                                                        |
| Insl6    | insulin-like 6                                                                                |
| Irgm2    | immunity-related GTPase family M member 2                                                     |
| Itgb8    | integrin beta 8                                                                               |
| Itgbl1   | integrin, beta-like 1                                                                         |
| Kat2b    | K(lysine) acetyltransferase 2B                                                                |
| Kbtbd11  | kelch repeat and BTB (POZ) domain containing 11                                               |
| Kcnab3   | potassium voltage-gated channel, shaker-related subfamily, beta member 3                      |
| Kcnmb2   | potassium large conductance calcium-activated channel, subfamily M, beta member 2             |
| Kif13b   | kinesin family member 13B                                                                     |
| Kif16b   | kinesin family member 16B                                                                     |
| Kif21a   | kinesin family member 21A                                                                     |
| Krt80    | keratin 80                                                                                    |
| Lama3    | laminin, alpha 3                                                                              |
| Lama5    | laminin, alpha 5                                                                              |
| Lims2    | LIM and senescent cell antigen like domains 2                                                 |
| Lmbr1    | limb region 1                                                                                 |
| Lonrf3   | LON peptidase N-terminal domain and ring finger 3                                             |
| Lrba     | LPS-responsive beige-like anchor                                                              |
| Lrrc27   | leucine rich repeat containing 27                                                             |
| Lrrc8b   | leucine rich repeat containing 8 family, member B                                             |
| Lrrc8d   | leucine rich repeat containing 8D                                                             |
| Lrsam1   | leucine rich repeat and sterile alpha motif containing 1                                      |
| Lztr1    | leucine-zipper-like transcriptional regulator, 1                                              |
| Magi3    | membrane associated guanylate kinase, WW and PDZ domain containing 3                          |
| Manba    | mannosidase, beta A, lysosomal                                                                |
| Map1lc3a | microtubule-associated protein 1 light chain 3 alpha                                          |
| Map3k8   | mitogen-activated protein kinase kinase kinase 8                                              |
| Map4k2   | mitogen-activated protein kinase kinase kinase kinase 2                                       |
| Mapre2   | microtubule-associated protein, RP/EB family, member 2                                        |
| Mapt     | microtubule-associated protein tau                                                            |
| Mblac2   | metallo-beta-lactamase domain containing 2                                                    |

Mfap3l microfibrillar-associated protein 3-like  
Mfsd6 major facilitator superfamily domain containing 6  
Mical3 microtubule associated monooxygenase, calponin and LIM domain containing 3  
Mknk2 MAP kinase-interacting serine/threonine kinase 2  
Mkrn1 makorin, ring finger protein, 1  
Mt2 metallothionein 2  
Mtap2 microtubule-associated protein 2  
Mtch2 mitochondrial carrier homolog 2 (C. elegans)  
Mtss1 metastasis suppressor 1  
Naip2 NLR family, apoptosis inhibitory protein 2  
Nalcn sodium leak channel, non-selective  
Nbeal2 neurobeachin-like 2  
Ncald neurocalcin delta  
Nceh1 arylacetamide deacetylase-like 1  
Ndrg2 N-myc downstream regulated gene 2  
Ndrg4 N-myc downstream regulated gene 4  
Neb1 nebulin  
Nedd9 neural precursor cell expressed, developmentally down-regulated gene 9  
Neu1 neuraminidase 1  
Nfe2l2 nuclear factor, erythroid derived 2, like 2  
Nipal3 NIPA-like domain containing 3  
Nkd2 naked cuticle 2 homolog (Drosophila)  
Nlr5 NLR family, CARD domain containing 5  
Nqo1 NAD(P)H dehydrogenase, quinone 1  
Nrn1 neuritin 1  
Nrxn3 neurexin III  
Nsg1 neuron specific gene family member 1  
Nt5e 5' nucleotidase, ecto  
Nup210 nucleoporin 210  
Obfc2a oligonucleotide/oligosaccharide-binding fold containing 2A  
Ociad2 OCIA domain containing 2  
Ocln occludin  
Odz4 odd Oz/ten-m homolog 4 (Drosophila)  
Olfm1 olfactomedin 1  
Pag1 phosphoprotein associated with glycosphingolipid microdomains 1  
Pcbd1 pterin 4 alpha carbinolamine dehydratase/dimerization cofactor of hepatocyte nuclear factor 1 alpha (TCF1) 1  
Pcp4l1 Purkinje cell protein 4-like 1  
Pde4b phosphodiesterase 4B, cAMP specific  
Pde4dip phosphodiesterase 4D interacting protein (myomegalin)  
Pdk4 pyruvate dehydrogenase kinase, isoenzyme 4  
Peg3 paternally expressed 3  
Perp PERP, TP53 apoptosis effector  
Pgpep1 pyroglutamyl-peptidase I  
Pi15 peptidase inhibitor 15  
Pik3ip1 phosphoinositide-3-kinase interacting protein 1  
Pim1 proviral integration site 1  
Pkp2 Plakophilin 2  
Pla2g2e phospholipase A2, group IIE  
Pla2g6 phospholipase A2, group VI  
Plcg2 phospholipase C, gamma 2  
Plcl2 phospholipase C-like 2  
Plekha6 pleckstrin homology domain containing, family A member 6  
Plekha7 pleckstrin homology domain containing, family A member 7  
Plekha1 pleckstrin homology domain containing, family B (evectins) member 1  
Plin2 perilipin 2  
Pltp phospholipid transfer protein  
Plxdc1 plexin domain containing 1  
Plxdc2 plexin domain containing 2  
Pmvk phosphomevalonate kinase  
Pnpla2 patatin-like phospholipase domain containing 2

|          |                                                                                                                                             |
|----------|---------------------------------------------------------------------------------------------------------------------------------------------|
| Pnpla6   | patatin-like phospholipase domain containing 6                                                                                              |
| Podxl    | podocalyxin-like                                                                                                                            |
| Pou4f1   | POU domain, class 4, transcription factor 1                                                                                                 |
| Ppp1r9a  | protein phosphatase 1, regulatory (inhibitor) subunit 9A                                                                                    |
| Prkag2   | protein kinase, AMP-activated, gamma 2 non-catalytic subunit                                                                                |
| Prrg4    | proline rich Gla (G-carboxyglutamic acid) 4 (transmembrane)                                                                                 |
| Prrx1    | paired related homeobox 1                                                                                                                   |
| Pzca     | prostate stem cell antigen                                                                                                                  |
| Ptgds    | prostaglandin D2 synthase (brain)                                                                                                           |
| Ptgis    | prostaglandin I2 (prostacyclin) synthase                                                                                                    |
| Ptgs1    | prostaglandin-endoperoxide synthase 1                                                                                                       |
| Ptp4a3   | protein tyrosine phosphatase 4a3                                                                                                            |
| Ptpkb    | protein tyrosine phosphatase-like (proline instead of catalytic arginine), member b                                                         |
| Ptpn22   | protein tyrosine phosphatase, non-receptor type 22 (lymphoid)                                                                               |
| Qpct     | glutaminyl-peptide cyclotransferase (glutaminyl cyclase)                                                                                    |
| Qser1    | glutamine and serine rich 1                                                                                                                 |
| Rab20    | RAB20, member RAS oncogene family                                                                                                           |
| Rab27b   | RAB27b, member RAS oncogene family                                                                                                          |
| Rab3il1  | RAB3A interacting protein (rabin3)-like 1                                                                                                   |
| Rab3ip   | RAB3A interacting protein                                                                                                                   |
| Rab43    | RAB43, member RAS oncogene family                                                                                                           |
| Rabepk   | Rab9 effector protein with kelch motifs                                                                                                     |
| Ralb     | v-ral simian leukemia viral oncogene homolog B (ras related)                                                                                |
| Ralgapa1 | Ral GTPase activating protein, alpha subunit 1                                                                                              |
| Ralgs1   | Ral GEF with PH domain and SH3 binding motif 1                                                                                              |
| Ralgs2   | Ral GEF with PH domain and SH3 binding motif 2                                                                                              |
| Rapgef3  | Rap guanine nucleotide exchange factor (GEF) 3                                                                                              |
| Rarb     | retinoic acid receptor, beta                                                                                                                |
| Rasa3    | RAS p21 protein activator 3                                                                                                                 |
| Rassf2   | Ras association (RalGDS/AF-6) domain family member 2                                                                                        |
| Rassf4   | Ras association (RalGDS/AF-6) domain family member 4                                                                                        |
| Rbm47    | RNA binding motif protein 47                                                                                                                |
| Rcan3    | regulator of calcineurin 3                                                                                                                  |
| Reep2    | receptor accessory protein 2                                                                                                                |
| Repin1   | replication initiator 1                                                                                                                     |
| Rftn1    | raftlin lipid raft linker 1                                                                                                                 |
| Rgs2     | regulator of G-protein signaling 2                                                                                                          |
| Rhpn2    | rhopilin, Rho GTPase binding protein 2                                                                                                      |
| Rnasel   | ribonuclease L (2', 5'-oligoadenylate synthetase-dependent)                                                                                 |
| Rnf157   | ring finger protein 157                                                                                                                     |
| Ropn1l   | ropporin 1-like                                                                                                                             |
| Rp2h     | retinitis pigmentosa 2 homolog (human)                                                                                                      |
| Runx1t1  | runt-related transcription factor 1; translocated to, 1 (cyclin D-related)                                                                  |
| Scd1     | stearoyl-Coenzyme A desaturase 1                                                                                                            |
| Scn5a    | sodium channel, voltage-gated, type V, alpha                                                                                                |
| Scrn1    | secernin 1                                                                                                                                  |
| Sema3d   | sema domain, immunoglobulin domain (Ig), short basic domain, secreted, (semaphorin) 3D                                                      |
| Sema5a   | sema domain, seven thrombospondin repeats (type 1 and type 1-like), transmembrane domain (TM) and short cytoplasmic domain, (semaphorin) 5A |
| Serpnb6b | serine (or cysteine) peptidase inhibitor, clade B, member 6b                                                                                |
| Serping1 | serine (or cysteine) peptidase inhibitor, clade G, member 1                                                                                 |
| Sfmbt2   | Scm-like with four mbt domains 2                                                                                                            |
| Sft2d2   | SFT2 domain containing 2                                                                                                                    |
| Sh3bgr   | SH3-binding domain glutamic acid-rich protein                                                                                               |
| Sigirr   | single immunoglobulin and toll-interleukin 1 receptor (TIR) domain                                                                          |
| Slc16a13 | solute carrier family 16 (monocarboxylic acid transporters), member 13                                                                      |
| Slc1a5   | solute carrier family 1 (neutral amino acid transporter), member 5                                                                          |
| Slc24a6  | solute carrier family 24 (sodium/potassium/calcium exchanger), member 6                                                                     |
| Slc25a23 | solute carrier family 25 (mitochondrial carrier; phosphate carrier), member 23                                                              |
| Slc25a30 | solute carrier family 25, member 30                                                                                                         |
| Slc27a1  | solute carrier family 27 (fatty acid transporter), member 1                                                                                 |

Slc2a3 solute carrier family 2 (facilitated glucose transporter), member 3  
 Slc2a6 solute carrier family 2 (facilitated glucose transporter), member 6  
 Slc31a2 solute carrier family 31, member 2  
 Slc48a1 solute carrier family 48 (heme transporter), member 1  
 Slc7a7 solute carrier family 7 (cationic amino acid transporter, y<sup>+</sup> system), member 7  
 Slc9a2 solute carrier family 9 (sodium/hydrogen exchanger), member 2  
 Slc9a3r1 solute carrier family 9 (sodium/hydrogen exchanger), member 3 regulator 1  
 Snx10 sorting nexin 10  
 Sord sorbitol dehydrogenase  
 Spint1 serine protease inhibitor, Kunitz type 1  
 Spn sialophorin  
 St6gal1 beta galactoside alpha 2,6 sialyltransferase 1  
 Stap2 signal transducing adaptor family member 2  
 Stard9 START domain containing 9  
 Stk32b serine/threonine kinase 32B  
 Strbp spermatid perinuclear RNA binding protein  
 Stx11 syntaxin 11  
 Svip small VCP/p97-interacting protein  
 Sybu syntabulin (syntaxin-interacting)  
 Syngri1 synaptogyrin 1  
 Syt11 synaptotagmin XI  
 Tbc1d4 TBC1 domain family, member 4  
 Tcf4 transcription factor 4  
 Tdrkh tudor and KH domain containing protein  
 Tek endothelial-specific receptor tyrosine kinase  
 Tgfr1 transforming growth factor, beta receptor I  
 Tgm2 transglutaminase 2, C polypeptide  
 Thbd thrombomodulin  
 Thsd4 thrombospondin, type I, domain containing 4  
 Tlcd1 TLC domain containing 1  
 Tik1 tousled-like kinase 1  
 Tlr3 toll-like receptor 3  
 Tlr4 toll-like receptor 4  
 Tm7sf2 transmembrane 7 superfamily member 2  
 Tm7sf3 transmembrane 7 superfamily member 3  
 Tmem106c transmembrane protein 106C  
 Tmem14a transmembrane protein 14A  
 Tmem25 transmembrane protein 25  
 Tmem64 transmembrane protein 64  
 Tmem71 transmembrane protein 71  
 Tnfaip2 tumor necrosis factor, alpha-induced protein 2  
 Tnfrsf22 tumor necrosis factor receptor superfamily, member 22  
 Tom111 target of myb1-like 1 (chicken)  
 Tox2 TOX high mobility group box family member 2  
 Tpd52 tumor protein D52  
 Tpd52l1 tumor protein D52-like 1  
 Trib2 tribbles homolog 2 (Drosophila)  
 Trim16 tripartite motif-containing 16  
 Trim7 tripartite motif-containing 7  
 Tslp thymic stromal lymphopoietin  
 Tspan11 tetraspanin 11  
 Tspan15 tetraspanin 15  
 Ttc19 tetratricopeptide repeat domain 19  
 Ttc21b tetratricopeptide repeat domain 21B  
 Tuft1 tuftelin 1  
 Txnrd3 thioredoxin reductase 3  
 Uap1l1 UDP-N-acetylglucosamine pyrophosphorylase 1-like 1  
 Ube2l6 ubiquitin-conjugating enzyme E2L 6  
 Uchl1 ubiquitin carboxy-terminal hydrolase L1  
 Unc45a unc-45 homolog A (C. elegans)  
 Vat1 vesicle amine transport protein 1 homolog (T. californica)

|        |                                          |
|--------|------------------------------------------|
| Wbp2   | WW domain binding protein 2              |
| Wnt4   | wingless-related MMTV integration site 4 |
| Xdh    | xanthine dehydrogenase                   |
| Xiap   | X-linked inhibitor of apoptosis          |
| Xpo7   | exportin 7                               |
| Yip2   | Yip1 domain family, member 2             |
| Ypel1  | yippee-like 1 (Drosophila)               |
| Zbtb20 | zinc finger and BTB domain containing 20 |
| Zdhhc2 | zinc finger, DHHC domain containing 2    |
| Zfp467 | zinc finger protein 467                  |
| Zfp605 | zinc finger protein 605                  |
| Znrf2  | zinc and ring finger 2                   |

---
